long-acting vasodilators would not be given intravenously to control blood pressure, which would be expected to decrease with the regional technique. Thus, it is possible that patients were put at some risk because of differences in initial treatment of high blood pressure.

The paper by Christopherson *et al.*<sup>2</sup> provides the initial analysis of outcomes from the study. Therefore, analysis in that paper is intentionally to treat. A second statistical analysis was performed in which the patients who were randomized to epidural anesthesia but who received general anesthesia were assigned to the general anesthesia group. Changing groups for these four patients did not alter any of the major outcomes of the trial.

The study by Rosenfeld *et al.*<sup>3</sup> is not the primary analysis, and therefore, it is permissible to analyze by treatment administered rather than by randomization. Since Rosenfeld *et al.* were studying mechanisms of perioperative thrombosis, the most rational and appropriate analysis is by treatment administration rather than treatment assignment. This provides a more accurate assessment of anesthetic effects on changes in fibrinolysis.

**Rose Christopherson, M.D., Ph.D.**  
Assistant Professor

**Brian A. Rosenfeld, M.D.**  
Assistant Professor

Anesthesiology  
80:486, 1994  
© 1994 American Society of Anesthesiologists, Inc.  
J. B. Lippincott Company, Philadelphia

## Factors Affecting Outcome in Patients Undergoing Peripheral Vascular Surgery: III

*To the Editor:*—The conclusion by Christopherson *et al.*<sup>1</sup> that “. . . epidural anesthesia is associated with a lower incidence of reoperation for inadequate tissue perfusion and therefore may be advantageous for this surgical population” is rather noncompelling. Of concern are the data in table 2 that demonstrate that above-the-ankle amputation was not decreased in a statistically significant manner in patients before discharge, nor was the 6-month vascular surgery outcome (amputation, regrafting, or thrombectomy) altered in patients who received epidural *versus* general anesthesia. Furthermore, the authors never state whether the patients were matched for the severity of their vascular disease.

In summary, I will find it very difficult to alter my clinical practice until more convincing data is forthcoming on the matter.

Department of Anesthesiology and Critical Care Medicine  
The Johns Hopkins Hospital  
600 North Wolfe Street  
Baltimore, Maryland 21287

### References

1. Meinert CL: Data analysis requirements and procedures, *Clinical Trials: Design, Conduct, and Analysis*. New York, Oxford University, 1986, pp 185–197
2. Christopherson R, Beattie C, Frank SM, Norris EJ, Meinert CL, Gottlieb SO, Yates H, Rock P, Parker SD, Perler BA, Williams GM: Perioperative morbidity in patients randomized to epidural or general anesthesia for lower extremity vascular surgery. *ANESTHESIOLOGY* 79: 422–434, 1993
3. Rosenfeld BA, Beattie C, Christopherson R, Norris EJ, Frank SM, Breslow MJ, Rock P, Parker S, Gottlieb SO, Perler BA, Williams GM, Scidler A, Bell W, The Perioperative Ischemia Randomized Anesthesia Trial Study Group: The effects of different anesthetic regimens of fibrinolysis and the development of postoperative arterial thrombosis. *ANESTHESIOLOGY* 79:435–434, 1993

(Accepted for publication November 3, 1993.)

**Lucy Waskell, M.D., Ph.D.**  
Anesthesiology Service (129)  
Veterans Administration Medical Center  
and University of California, San Francisco  
4150 Clement Street  
San Francisco, California 94121

### Reference

1. Christopherson R, Beattie C, Frank SM, Norris E, Meinert C, Gottlieb S, Yates H, Rock P, Parker S, Perler B, Williams GM: Perioperative morbidity in patients randomized to epidural or general anesthesia for lower extremity vascular surgery. *ANESTHESIOLOGY* 79: 422–434, 1993

(Accepted for publication November 16, 1993.)
